# Supplementary material for: Tissue-Specific Differences in Human Transfer RNA Expression
Source: PLOS journal article supplement (doi:10.1371/journal.pgen.0020221), 2006-01-01
Supplement: S1 (10.1371/journal.pgen.0020221.s001) [file journal.pgen.0020221.sg001.pdf › journal.pgen.0020221.sg001.pdf]

Tissue-specific differences in human tRNA expression.

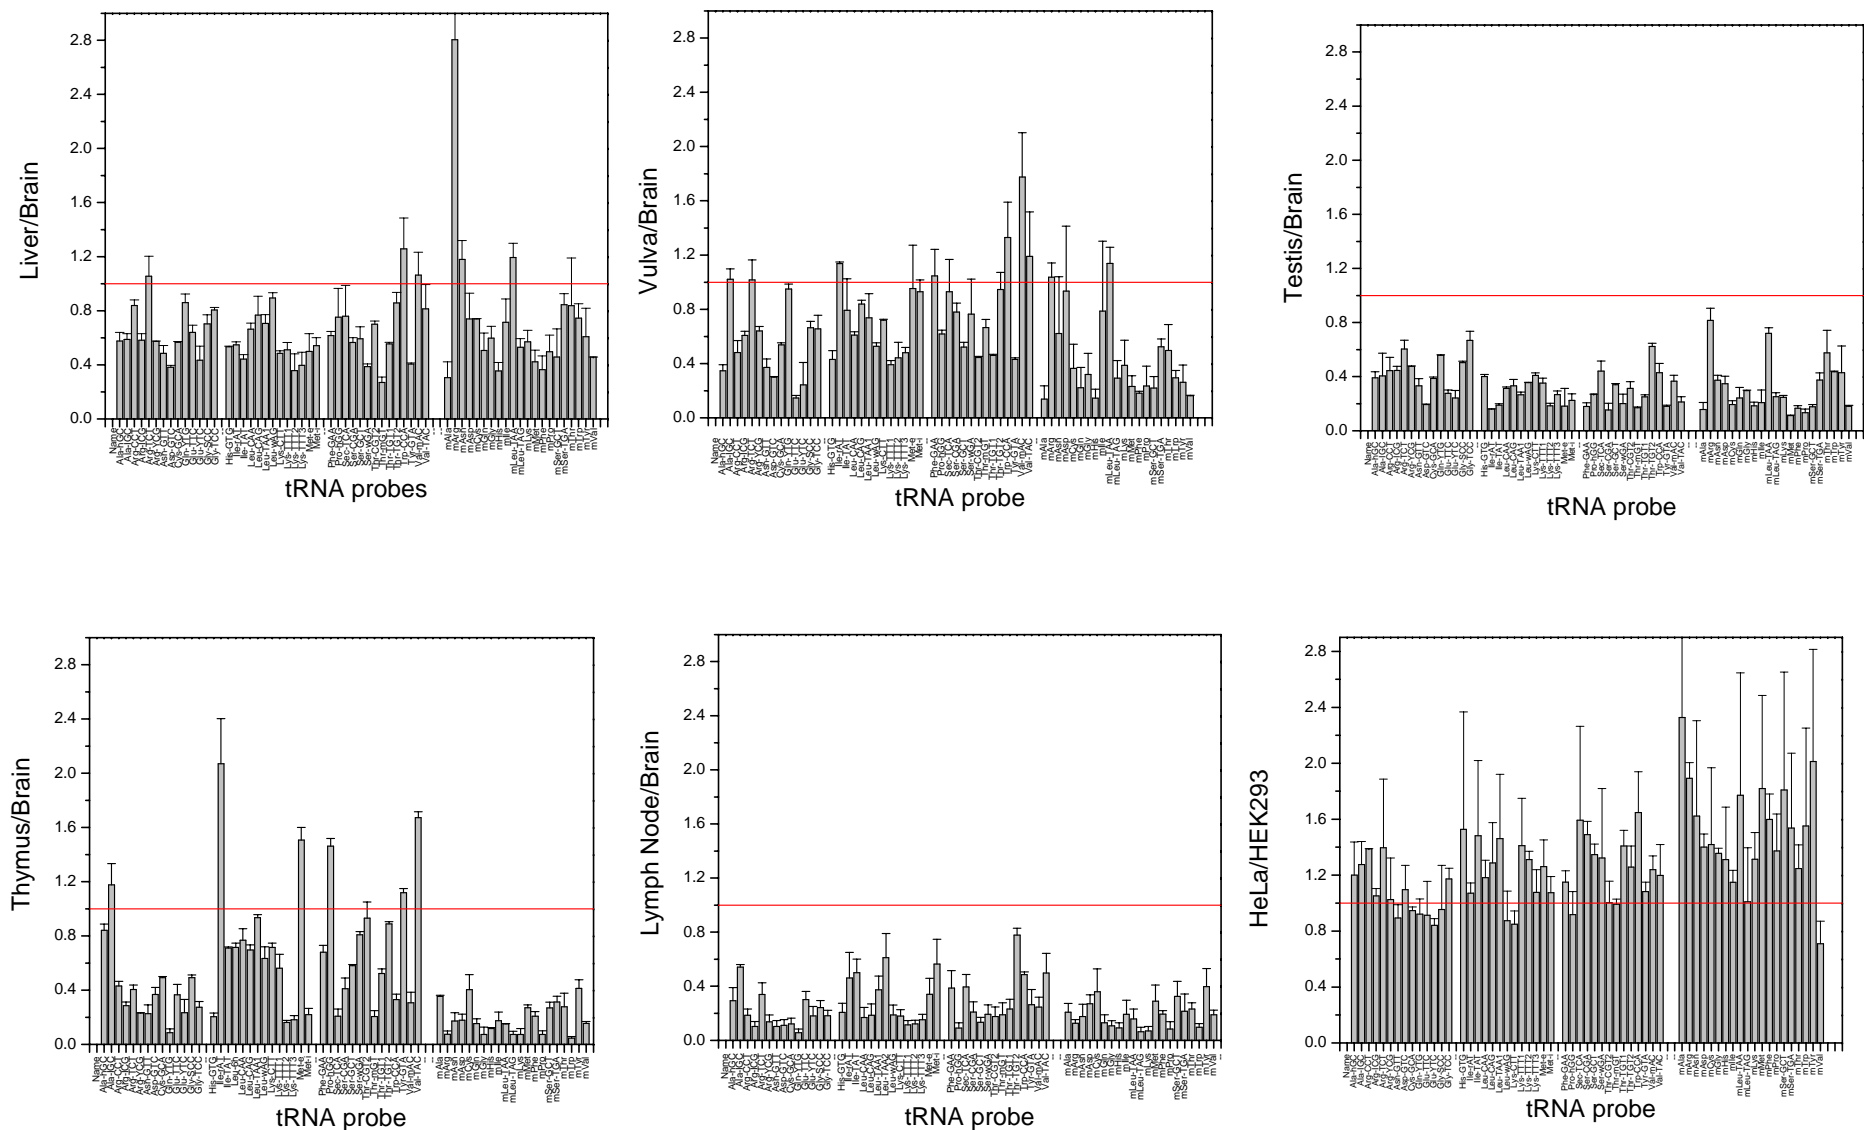

Fig. S1. Relative ratios of each human tRNA probe for liver, vulva, testis, thymus and lymph node versus brain. Bottom right: tRNA abundance in two cell lines.
