# Supplementary material for: Tissue-Specific Differences in Human Transfer RNA Expression
Source: PLOS journal article supplement (doi:10.1371/journal.pgen.0020221), 2006-01-01
Supplement: S1 (10.1371/journal.pgen.0020221.s001) [file journal.pgen.0020221.st001.pdf › journal.pgen.0020221.st001.pdf]

*Tissue-specific differences of human tRNA expression.*

Table S1. Human probes for chromosomal encoded tRNA genes.

| <b>Probe name (#genes)</b> | <b>Anticodon</b>      | <b>Preferred codons</b> |
|----------------------------|-----------------------|-------------------------|
| Ala-IGC (21)               | IGC                   | GCU/C                   |
| Ala-hGC (21)               | IGC(7)+CGC(5)+TGC(9)  | GCU/C/A/G               |
| Arg-ICG (7)                | ICG                   | CGU/C                   |
| Arg-YCG (11)               | CCG(5)+TCG(6)         | CGG/A                   |
| Arg-CCT (5)                | CCT                   | AGG                     |
| Arg-TCT (6)                | TCT                   | AGA                     |
| Asn-GTT (24)               | GTT                   | AAU/C                   |
| Asp-GTC (15)               | GTC                   | GAU/C                   |
| Cys-GCA (29)               | GCA                   | UGU/C                   |
| Gln-YTG (20)               | CTG(13)+TTG(7)        | CAA/G                   |
| Glu-YTC (16)               | CTC(8)+TTC(4)         | GAA/G                   |
| Glu-TTC (4)                | TTC                   | GAA                     |
| Gly-SCC (19)               | CCC(7)+GCC(14)        | GGC/U/G                 |
| Gly-TCC (9)                | TCC                   | GGA                     |
| His-GTG (10)               | GTG                   | CAU/C                   |
| Ile-IAT (15)               | IAT                   | AUU/C                   |
| Ile-TAT (5)                | TAT                   | AUA                     |
| Leu-wAG (12)               | IAG(9)+TAG(3)         | CUU/C/A                 |
| Leu-CAG (9)                | CAG                   | CUG                     |
| Leu-CAA (6)                | CAA                   | UUG                     |
| Leu-TAA1 (5)               | TAA                   | UUA/G                   |
| Leu-TAA2 (1)               | TAA                   | UUA/G                   |
| Lys-CTT (12)               | CTT                   | AAG                     |
| Lys-TTT1 (12)              | TTT                   | AAA                     |
| Lys-TTT2 (1)               | TTT                   | AAA                     |
| Lys-TTT3 (1)               | TTT                   | AAA                     |
| Met-i (9)                  | CAT                   | AUG                     |
| Met-e (10)                 | CAT                   | AUG                     |
| Phe-GAA (11)               | GAA                   | UUU/C                   |
| Pro-hGG (21)               | IGG(10)+CGG(4)+UGG(7) | CCU/C/A/G               |
| Sec-TCA (1)                | TCA                   | UGA                     |
| Ser-CGA (4)                | CGA                   | UCG                     |
| Ser-wGA (14)               | IGA(10)+TGA(4)        | UCU/C/A                 |
| Ser-GCT (8)                | GCT                   | AGU/C                   |

*Tissue-specific differences of human tRNA expression.*

|              |                 |         |
|--------------|-----------------|---------|
| Thr-mGT (11) | IGT(9)+CGT(2)   | ACU/C/G |
| Thr-TGT1 (8) | TGT             | ACA     |
| Thr-CGT1 (1) | CGT             | ACG     |
| Thr-TGT2 (1) | TGT             | ACA     |
| Thr-CGT2 (2) | CGT             | ACG     |
| Trp-CCA (7)  | CCA             | UGG     |
| Tyr-GTA (13) | GTA             | UAU/C   |
| Val-mAC (25) | IAC(10)+CAC(15) | GUU/C/G |
| Val-TAC (5)  | TAC             | GUA     |

S=C,G; Y=C,T; h=I,C,T; m=I,C;r=I,G; w=I,T.
