# Supplementary material for: Tissue-Specific Differences in Human Transfer RNA Expression
Source: PLOS journal article supplement (doi:10.1371/journal.pgen.0020221), 2006-01-01
Supplement: S2 (10.1371/journal.pgen.0020221.s002) [file journal.pgen.0020221.st002.pdf › journal.pgen.0020221.st002.pdf]

*Tissue-specific differences of human tRNA expression.*

Table S2. Sequences of Human probes for chromosomal encoded tRNA genes.

| Probe name | Sequence (5' - 3') <sup>a</sup>                                                                                  |
|------------|------------------------------------------------------------------------------------------------------------------|
| Ala-IGC    | TGGAGAATGYGGGCGTCGATCCC <b>R</b> CTACCTCTYGCATGCTAAGCRAGCGCTCTACCRCTGAGCTAATTCCCC                                |
| Ala-hGC    | TGGAGRTGCCGGGGATYGAACCCGGGR <b>C</b> CTCRTRCATGCSAAGCAYGCGCTCTACCACTGAGCTACAYCCCC                                |
| Arg-ICG    | CGAGCCAGCCAGGAGTCGAACCT <b>R</b> GAACTCTTCTGATCCGTAGTCAGACGCGTTATCCATTGCGCCACTGGCCC                              |
| Arg-YCG    | CAACCACGRAGGGACTCGAACCCTCAATCTTCTGATCCG <b>R</b> ARTCAGACGCCTTATCCATTAGGCCACGCGGCC                               |
| Arg-CCT    | TACCCAGGTGGGACTCGAACCACAATCCCTGGCTTAGGAGGCCAGTGCCTTATCCATTAGGCCACTGGGGC                                          |
| Arg-TCT    | CGACTCTGCYGGGACTCGAACCCG <b>W</b> AACCTTTGAATTAGAAGTCCAATGCGCTATCCATTGCGCCACAGAGCC                               |
| Asn-GTT    | CGTCCCTGGGTGGGCTCGAACCACCAACCTTTCGGTTAACAGCCGAACGCGCTAACCGATTGCGCCACAGAGAC                                       |
| Asp-GTC    | CTCCCCGTCGGGGAATCGAACCCCGGTCTCCCGCTGACAGGCGGGGATACTCACCCTATACTAACGAGGA                                           |
| Cys-GCA    | AGGGGGCACCYGGATT <b>T</b> GAAACCRGGGACCTCTTGATCTGCAGTCAAATGCTCTACCMCTGAGCTATACCCCC                               |
| Gln-YTG    | AGGTTCCACCGAGAYTTGAACTCGGATCGCTGGATT <b>C</b> ARAGTCCAGAGTGCTHACCATTACACCATGG <b>R</b> ACC                       |
| Glu-YTC    | TTCCCTGACCGGAATCGAACCCGGGGCC <b>W</b> MGGCGGTGARAGCGCCGAATCCTARCCACTAGACCACCAGG <b>R</b>                         |
| Glu-TTC    | TTCCCA <b>Y</b> ACCGGGAGTCGAACCCGGGGC <b>R</b> CCTGGGTGAAACCAGGAATCCTAACCGCTAGACCAT <b>R</b> TGGGA               |
| Gly-SCC    | TGCATTGGCC <b>R</b> GGAATYGAACCCGGGYCTCC <b>R</b> CGTGGWAGGCGAGAATTCTACCACTG <b>M</b> ACCACCM <b>Y</b> AGC       |
| Gly-TCC    | TGCGTTGGCCGGGAATCGAACCCGGGTCAACTGCTTGGAAGGCAGCTATGCTCACCCTATAACCACCAACGC                                         |
| His-GTG    | TGCCGTGACTCGGATT <b>C</b> GAAACCGAGGTTGCTGCGGCCACAACGCAGAGTACTAACCACTATACGATCACGGC                               |
| Ile-IAT    | TGGCC <b>M</b> GTACGGGGATCGAACCCGCGACCTTGCGGTTATTAGCACCACGCTCTAACCAACTGAGCTAAC <b>R</b> GCC                      |
| Ile-TAT    | TGCTCCAGGTGAG <b>G</b> MTCGAACTCACAACCTCGGCATTATAAGTACCGCGCGCTAACCGATTGCGCCACTGGAGC                              |
| Leu-wAG    | TGGCAGYGGTGGGATT <b>C</b> RAACCCACGCCYCCGAARAGACTGGAGCCTTAATCCAGCGCCTTAGACC <b>R</b> CTCGGCCAC <b>R</b> CTA      |
| Leu-CAG    | TGTCARAAGTGGGATT <b>C</b> GAAACCCACGCCTCCAGWGGAGG <b>W</b> TGCGATTTGAACGCAGCGCCTTAAGACYGCTCGGCCATCC              |
| Leu-CAA    | TGTCAGAAGTGGGATT <b>C</b> GAAACCCACGCCTCCATTGGAGACCAGAACTTGAGTCTGGCGCCTTAGACCACTCGGCCATCC                        |
| Leu-TAA1   | TACCRGGAGTGGGGYTCGAACCCACGCGGACAY <b>C</b> SGTCCATTGGATCTTAAGTCCAACGCCTTAACCACT <b>C</b> RGCCATCC                |
| Leu-TAA2   | TGTTAA <b>K</b> RAGAGGAGTTGAACCTCTGATTATAAA <b>R</b> TTTTTAAGTYTTATGCAATT <b>R</b> CC <b>R</b> GGCTCTGCCATCTTAAC |
| Lys-CTT    | CGCCCAACGTGGGGCTCGAACCCACGACCCTGAGATTAAAGAGTCTCATGCTCTACCGACTGAGCTAGCCGGGC                                       |
| Lys-TTT1   | CGCCYGAACAGGGACTTGAACCC <b>T</b> GGACCCTCAGATTAAAGTCTGATGCTCTACCR <b>A</b> CTGAGCTATCC <b>R</b> GGC              |
| Lys-TTT2   | CACCCAAAAGGGACATGAACCTTGGACCCTCAGATTAAAGTCTGATGCTCTACTGACTGAGCTATCTGGGT                                          |
| Lys-TTT3   | CGCCTGGACAGGGACTTGAACCCTAGACCCTCAGATTAAAGTCTGATGTTCTACCTACTGAGCTACCCAGGT                                         |
| Met-i      | TAGCAGAGGATGGTTTTCGATCCATCGACCTCTGGGTTATGGGCCCAGCACGCTTCCGCTGCGCCACTCTGCT                                        |
| Met-e      | TGCCC <b>Y</b> CTCTGAGGCTCGAACTCAGGACCTTCAGATTATGAGACTGACGCGCTGCC <b>H</b> RCTGCGCTAAG <b>R</b> RGGC             |
| Phe-GAA    | TG <b>C</b> YGAAACCCGGGATYGAACCAGGGACCTTTAGATCTTCAGTCTAACGCTCTCCCAACTGAGCTATTTCCGC                               |
| Pro-hGG    | GGGCTCGTCCGGGATTTGAACCCGGGACCTCTCGCACCC <b>D</b> AAGCGAGAATCATACCCCTAGACCAACGAGCC                                |
| Sec-TCA    | TGACCACAAAGGGACTCAAACCTCAATCTTCTGATCTGAAGTCAGACACCTTATCCATTAAGGCCACACGGTC                                        |
| Ser-CGA    | GCTGTGAGCAGGATTTGAACCTGCGCGGGGARACCCCAATTGGATTT <b>C</b> GAGTCCAACGCCTTAACCACTCGGCCATCAG                         |
| Ser-wGA    | GTAGYCGGCAGGATTCGAACCTGCGCGGGGARACCCCAATGGATTT <b>C</b> SAGTCCATCGCCTTAACCACTCGGCCACGACTA                        |
| Ser-GCT    | GACGAG <b>R</b> TGGGATTCGAACCCACGYGTGCAGAGCACAAATGGATTAGCAGTCCATCGCCTTAACCACTCGGCCACCTCGT                        |

*Tissue-specific differences of human tRNA expression.*

|                            |                                                                                                                                   |
|----------------------------|-----------------------------------------------------------------------------------------------------------------------------------|
| Thr-mGT                    | AGGCCCC <b>R</b> CTGGGA <b>K</b> TCGAACCCAGGATCTCCTGTTTAC <b>K</b> AGACAGGCGCTTTAACC <b>A</b> RCTAAGCCAY <b>Y</b> R <b>G</b> NGCC |
| Thr-TGT1                   | AGGCCCCAGCGAGATT <b>Y</b> GAACTCGCGACCCCTGGTTTACAAGACCAGTGCTCTAACC <b>M</b> CTGAGCTATGGAGCC                                       |
| Thr-CGT1                   | AGGCCCTGGTGAGATTTGAACCTCACGACCCCTAGGTTTACGAGACCAGCGCTCCAACCGCTGAGCTACAGGGCC                                                       |
| Thr-TGT2                   | TGCTGCTCACAGGACTCGAACCTGCATTTCCATCCTTACAAGGGATGTGTAATAGCCAATTATACGAAAGCAGC                                                        |
| Thr-CGT2                   | AGGCACGGACGGGGTTTCGAACCCG <b>Y</b> GATCTTCGGTTTACGAGACCGACGCCTTACCACTTGGCCACCGCGCC                                                |
| Trp-CCA                    | TGACCCCGACGTGATTTGAACACGCAACCTTCTGATCTGGAGTCAGACGCGCTACCGTTGCGCCACGAGGTC                                                          |
| Tyr-GTA                    | TCCTTCGAGCCGG <b>A</b> STCGAACCCAGCGACCTAAGGATCTACAGTCCTCCGCTCTACCA <b>R</b> CTGAGCTATCGAAGG                                      |
| Val-mAC                    | TGTTTC <b>Y</b> GCC <b>Y</b> GGTTTCGAACCC <b>R</b> GGGACCTTTCGCGTG <b>T</b> KAGGCGAACGTGATAACCACTACACTAC <b>R</b> GAAAC           |
| Val-TAC                    | TGGTTCCACTGGGGCTCGAACCCAGGACCTTCTGCGTGTAAGCAGACGTGATAACCACTACACTATGGAACC                                                          |
|                            |                                                                                                                                   |
| E.coli tRNA <sup>Lys</sup> | TGGGTCGTGCAGGATTTCGAACCTGCGACCAATTGATTAAAAAGTCAACTGCTCTACCAACTGAGCTAACGACCC                                                       |
| E.coli tRNA <sup>Tyr</sup> | TGGGGGAAGGATTTCGAACCTTCGAAGTCGATGACGGCAGATTTACAGTCTGCTCCCTTTGGCCGCTCGGGAAACCCACC                                                  |
| Yeast tRNA <sup>Phe</sup>  | TGCGAATTCTGTGGATCGAACACAGGACCTCCAGATCTTCAGTCTGGCGCTCTCCCAACTGAGCTAAATCCGC                                                         |

a. M = A/C; K = G/T; S = G/C; D = A/G/T; W = A/T; H = A/C/T.
