# Supplementary material for: Tissue-Specific Differences in Human Transfer RNA Expression
Source: PLOS journal article supplement (doi:10.1371/journal.pgen.0020221), 2006-01-01
Supplement: S3 (10.1371/journal.pgen.0020221.s003) [file journal.pgen.0020221.st003.pdf › journal.pgen.0020221.st003.pdf]

*Tissue-specific differences of human tRNA expression.*

Table S3. Human probes for mitochondrial encoded tRNA genes.

| <b>probe name</b> | <b>Anticodon</b> | <b>Read codons</b> |
|-------------------|------------------|--------------------|
| mAla-TGC          | TGC              | GCN                |
| mArg-TCG          | TCG              | CGN                |
| mAsn-GTT          | GTT              | AAU/C              |
| mAsp-GTC          | GTC              | GAU/C              |
| mCys-GCA          | GCA              | UGU/C              |
| mGln-TTG          | TTG              | CAA/G              |
| mGlu-TTC          | TTC              | GAA/G              |
| mGly-TCC          | TCC              | GGN                |
| mHis-GTG          | GTG              | CAU/C              |
| mIle-GAT          | GAT              | AUU/C/A            |
| mLeu-TAG          | TAG              | CUN                |
| mLeu-TAA          | TAA              | UUA/G              |
| mLys-TTT          | TTT              | AAA/G              |
| mMet-CAT          | CAT              | AUG                |
| mPhe-GAA          | GAA              | UUU/C              |
| mPro-TGG          | TGG              | CCN                |
| mSer-TGA          | TGA              | UCN                |
| mSer-GCT          | GCT              | AGU/C              |
| mThr-TGT          | TGT              | ACN                |
| mTrp-TCA          | TCA              | UGA/G              |
| mTyr-GTA          | GTA              | UAU/C              |
| mVal-TAC          | TAC              | GUN                |
