# Supplementary material for: Tissue-Specific Differences in Human Transfer RNA Expression
Source: PLOS journal article supplement (doi:10.1371/journal.pgen.0020221), 2006-01-01
Supplement: S4 (10.1371/journal.pgen.0020221.s004) [file journal.pgen.0020221.st004.pdf › journal.pgen.0020221.st004.pdf]

*Tissue-specific differences of human tRNA expression.*

Table S4. Human probe sequences for mitochondrial encoded tRNA genes.

| probe name | Sequence (5'-3')                                                            |
|------------|-----------------------------------------------------------------------------|
| mAla-TGC   | TAAGGACTGCAAAACCCCACTCTGCATCAACTGAACGCAAAATCAGCCACTTTAATTAAGCTAAGCCCTT      |
| mArg-TCG   | TTGGTAAATATGATTATCATAATTTAATGAGTCGAAATCATTCGTTTTGTTTAAACTATATACCA           |
| mAsn-GTT   | CTAGACCAATGGGACTTAAACCCACAAACACTTAGTTAACAGCTAAGCACCTAATCAACTGGMTTCAATCTA    |
| mAsp-GTC   | TAAGATATATAGGATTTAGCCTATAATTTAACTTTGACAAAGTTATGAAATGGTTTTTCTAATACCTT        |
| mCys-GCA   | AAGCCCCGGCAGGTTTGAAGCTGCTTCTTCGAATTTGCAATTCAATATGAAAATCACCTCGGAGCT          |
| mGln-TTG   | CTAGGACTATGAGAATCGAACCCATCCCTGAGAATCCAAAATTCCTCCGTGCCACCTATCACACCCCATCCTA   |
| mGly-TCC   | TACTCTTTTTTGAATGTTGTCAAAACTAGTTAATTGGAAGTTAACGGTACTATTTATACTAAAAGAGT        |
| mHis-GTG   | GGTAAATAAGGGGTCGTAAGCCTCTGTTGTCAGATTACAATCTGATGTTTTGGTTAAACTATATTTAC        |
| mIle-GAT   | TAGAAATAAGGGGGTTTAAAGCTCCTATTATTTACTCTATCAAAGTAACTCTTTTATCAGACATATTTCT      |
| mLeu-TAG   | TACTTTTATTTGGAGTTGCACCAAAATTTTTGGGGCCTAAGACCAATGGATAGCTGTTATCCTTTAAAAGT     |
| mLeu-TAA   | TGTTAAGAAGAGGAATTGAACCTCTGACTGTAAAGTTTTAAGTTTTATGCGATTACCGGGCTCTGCCATCTTAAC |
| mLys-TTT   | TCACTGTAAAGAGTTGGTTCTCTTAATCTTTAACTTAAAAGGTAAATGCTAAGTTAGCTTTACAGTG         |
| mMet-CAT   | TAGTACGGGAAGGGTATAACCAACATTTTCGGGGTATGGGCCCCGATAGCTTATTTAGCTGACCTTACT       |
| mPhe-GAA   | TGTTTATGGGGTGATGTGAGCCCGTCTAAACATTTTCAGTGTATTGCTTTGAGGAGGTAAGCTACATAAAC     |
| mPro-TGG   | TCAGAGAAAAAGTCTTTAACTCCACCATTAGCACCCAAAGCTAAGATTCTAATTTAACTATTCTCTG         |
| mSer-TGA   | CAAAAAAGGAAGGAATCGAACCCCCCAAAGCTGGTTTCAAGCCAACCCCATGGCCTCCATGACTTTTTTC      |
| mSer-GCT   | TGAGAAAGCCATGGTAGACATGGGGGCATGAGTTAGCAGTTCTTGTGAGCTTTCTC                    |
| mThr-TGT   | TGTCCTTGGA AAAAGGTTTTCATCTCCGGTTTACAAGACTGGTGTATTAGTTTATACTACAAGGAC         |
| mTrp-TCA   | CAGAAATTAAGTATTGCAACTTACTGAGGGCTTTGAAGGCTCTTGGTCTGTATTTAACCTAAATTTCT        |
| mTyr-GTA   | TGGTAAAAAGAGGCCTAACCCCTGTCTTTAGATTTACAGTCCAATGCTTCACTCAGCCATTTTACC          |
| mVal-TAC   | TCAGAGCGGTCAAGTTAAGTTGAAATCTCCTAAGTGTAAGTTGGGTGCTTTGTGTTAAGCTACACTCTG       |
